# Supplementary material
Source: PubMed Central journal article supplement (PMC11072024)
Supplement: 18_2022_4481_MOESM2_ESM.pdf [file 18_2022_4481_MOESM2_ESM.pdf]

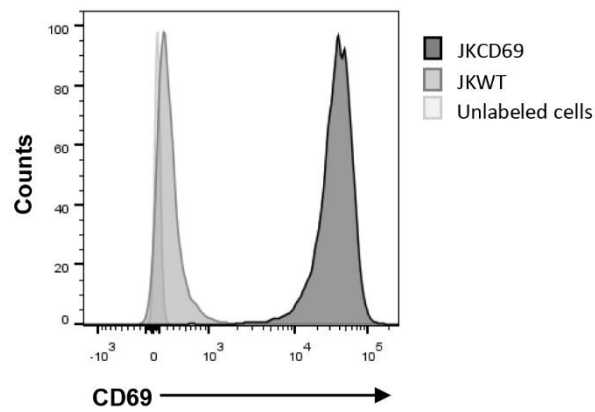

**Supplementary Figure 1. CD69 expression levels by flow cytometry.** Histograms of the CD69 expression of Jurkat cell line stably transfected or not with CD69 (JKwt and JKCD69, respectively).

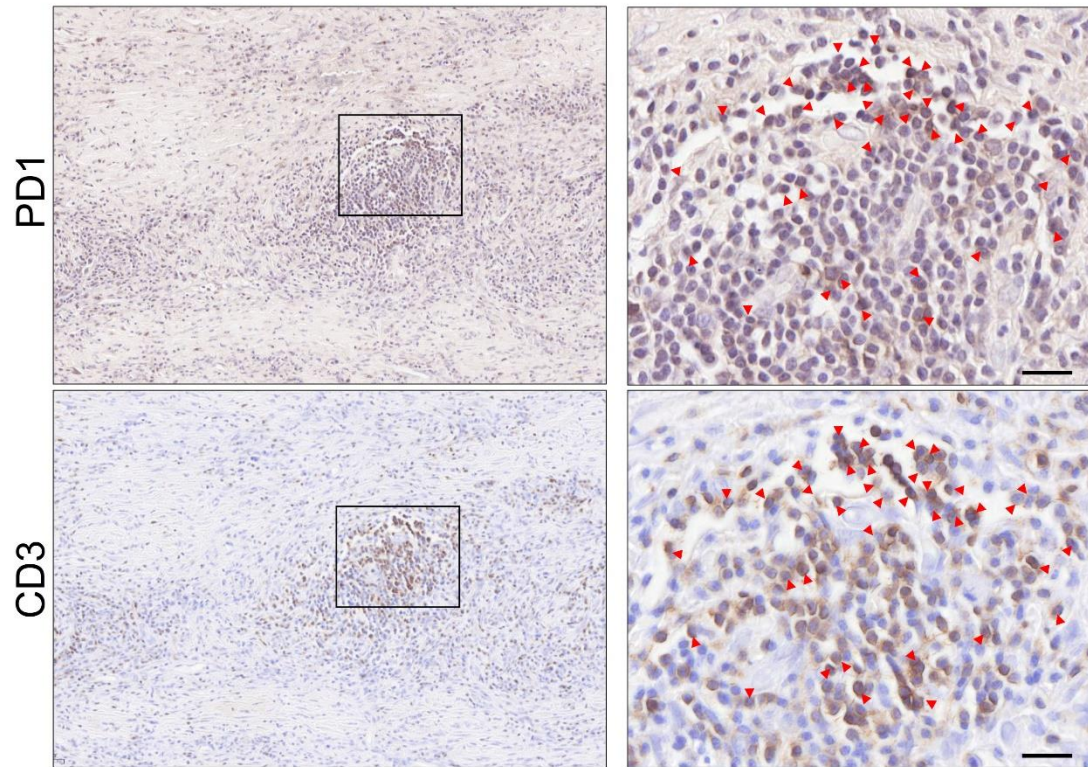

**Supplementary Figure 2. PD-1 is expressed in CD3<sup>+</sup> cells in inflamed human arteries.** PD-1 and CD3 immunostaining in consecutive cross-sections corresponding to inflamed abdominal aortic samples (IAA). The boxed areas are shown at a higher magnification on the right and red arrowheads depict cells that express both proteins in consecutive sections. Scale bars: 20  $\mu$ m.
